# Supplementary material
Source: Springer Nature journal article supplement (https://www.springermedizin.de/resource/supplementary/12955_2013_1239_MOESM2_ESM.pdf/9559150)

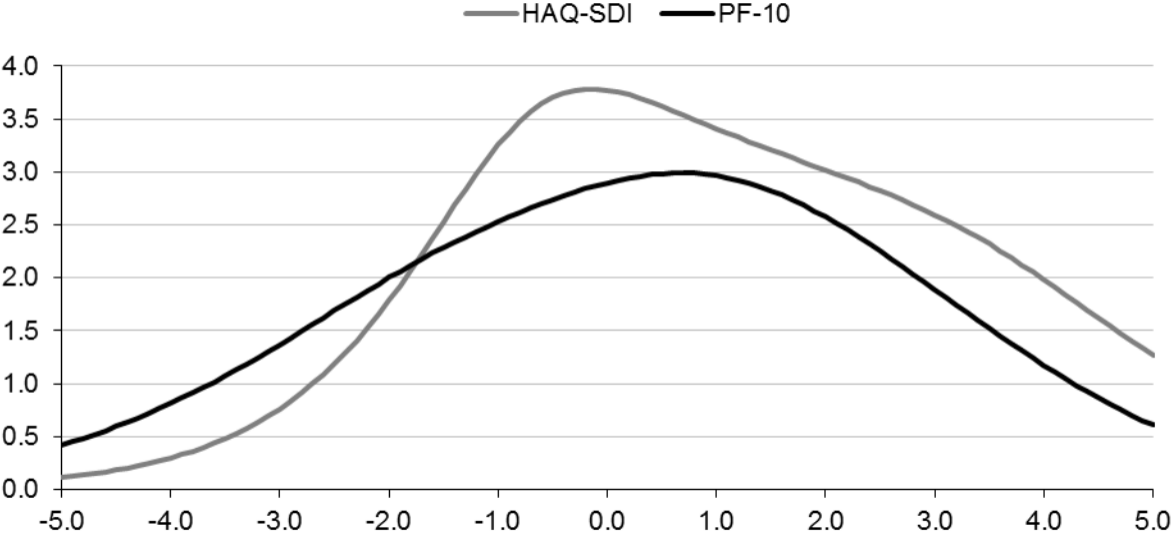

Supplement: MOESM2 [file 9559150]
